# Supplementary material
Source: publisher site journal article supplement (https://www.dovepress.com/article/336428)
Supplement: Supplementary file 1 [file get_supplementary_file.php]

**S1**


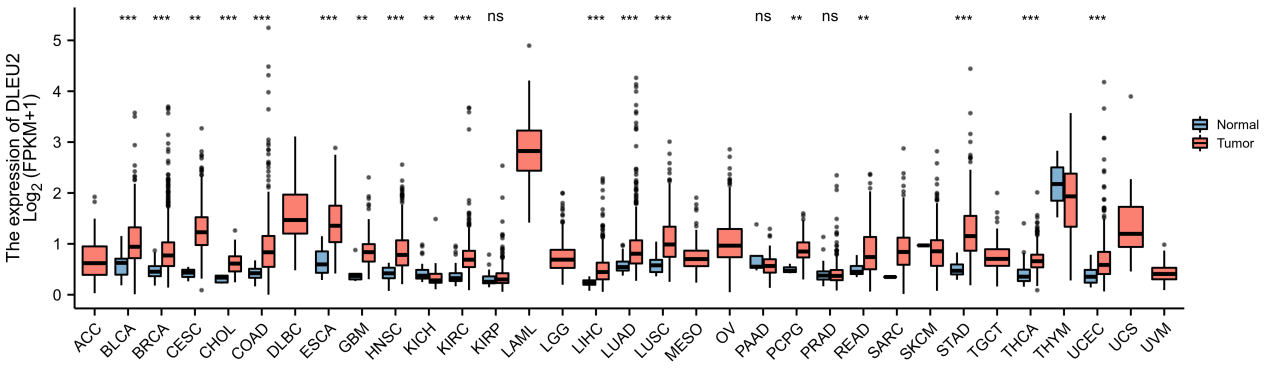


**S2**


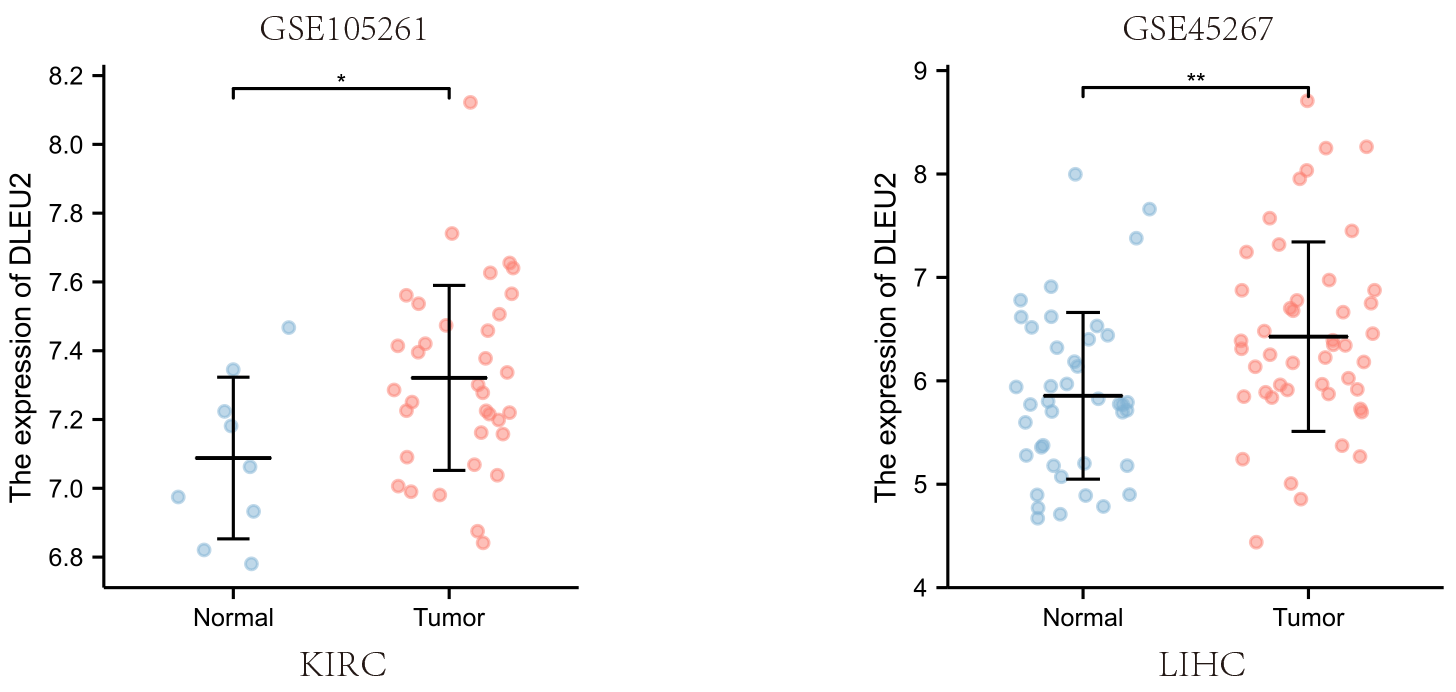


**S3**

**
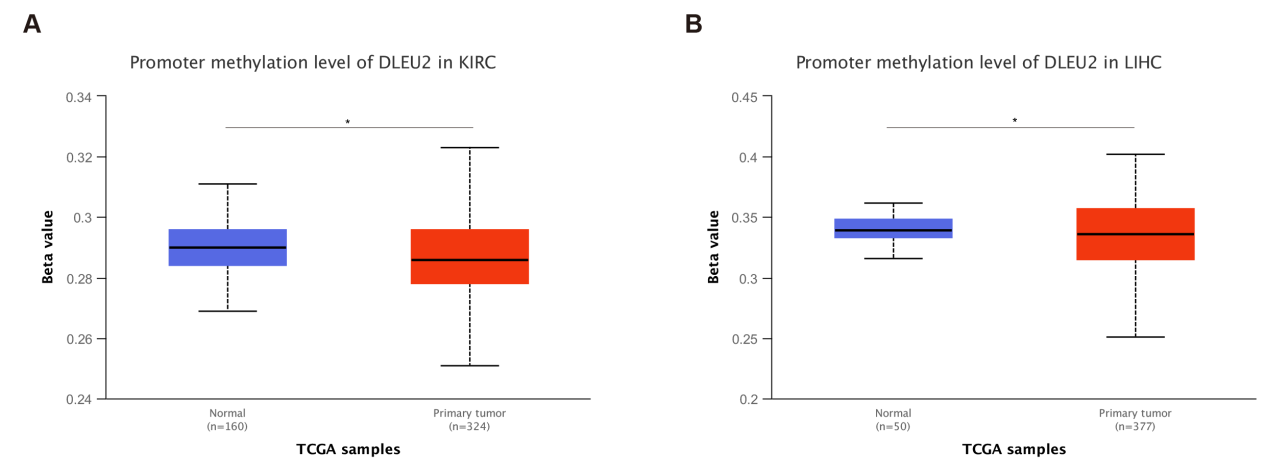
**

Figure **S1** Differential expression of DLEU2 between cancerous tissue samples and normal tissue samples in human carcinomas. ns, not significant; **p<0.01; ***p<0.001.

Figure **S2** Expression of DLEU2 in KIRC and LIHC tissues. (**A**) Expression of DLEU2 in KIRC from the GSE105261 dataset. (**B**) Expression of DLEU2 in LIHC from the GSE45267 dataset. *p<0.05; **p<0.01; KIRC, Kidney renal clear cell carcinoma; LIHC, Liver hepatocellular carcinoma.

Figure **S3** Methylation difference in DLEU2 in KIRC (**A**) and LIHC (**B**) compared to that in normal samples. *p<0.05; KIRC, Kidney renal clear cell carcinoma; LIHC, Liver hepatocellular carcinoma.
